# Supplementary material for: Autophagy diminishes the early interferon-β response to influenza A virus resulting in differential expression of interferon-stimulated genes
Source: PubMed Central journal article supplement (PMC5945842; doi:10.1038/s41419-018-0546-5), 2018-05-10

C

NF-KAPPA B SIGNALING PATHWAY

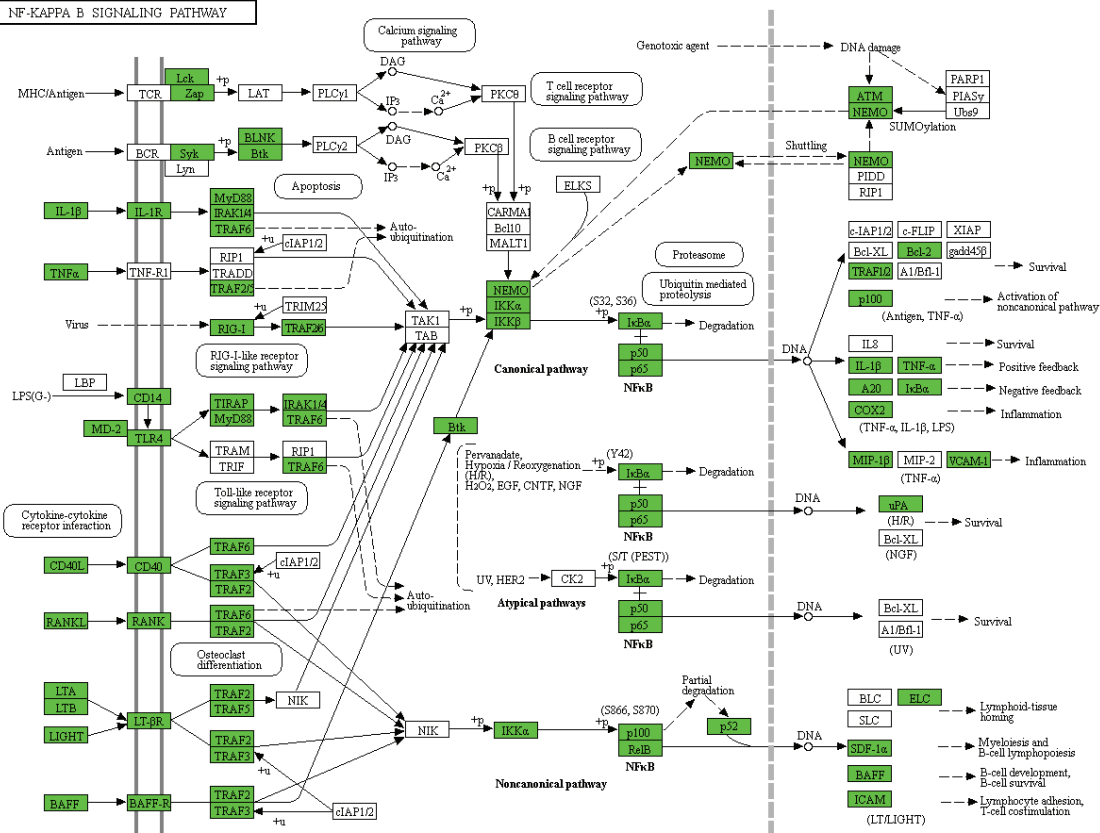

d

TNF SIGNALING PATHWAY

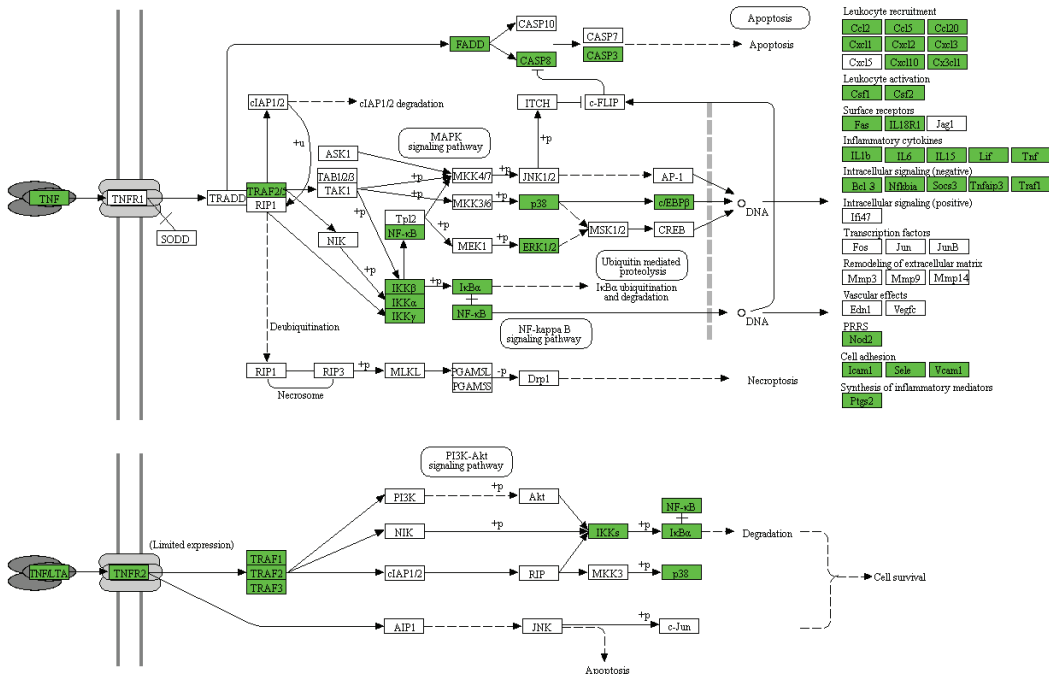

# Supplementary Figure 2

**a**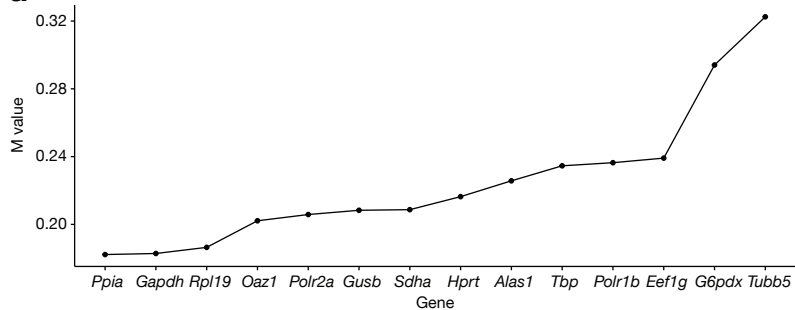**b**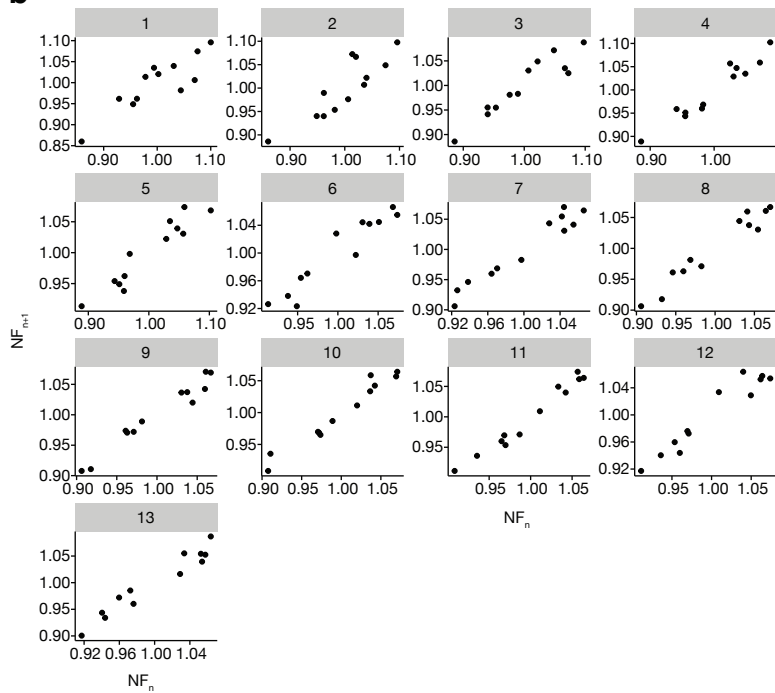**c**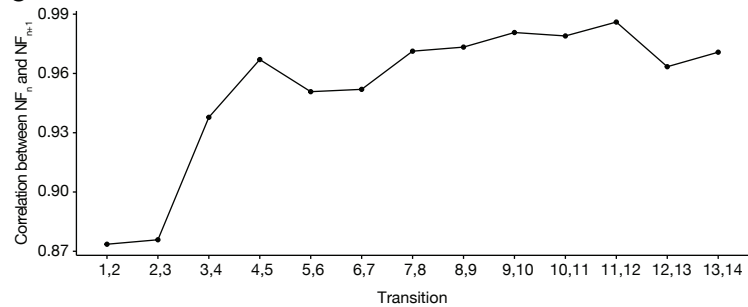

# Supplementary Figure 3

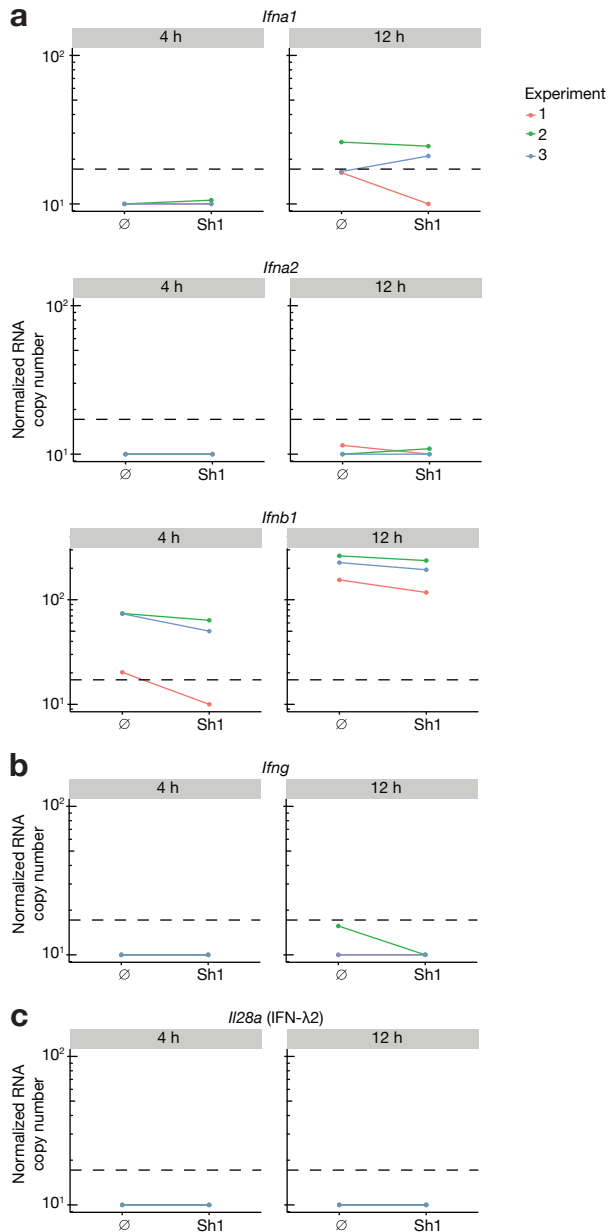

# Supplementary Figure 4

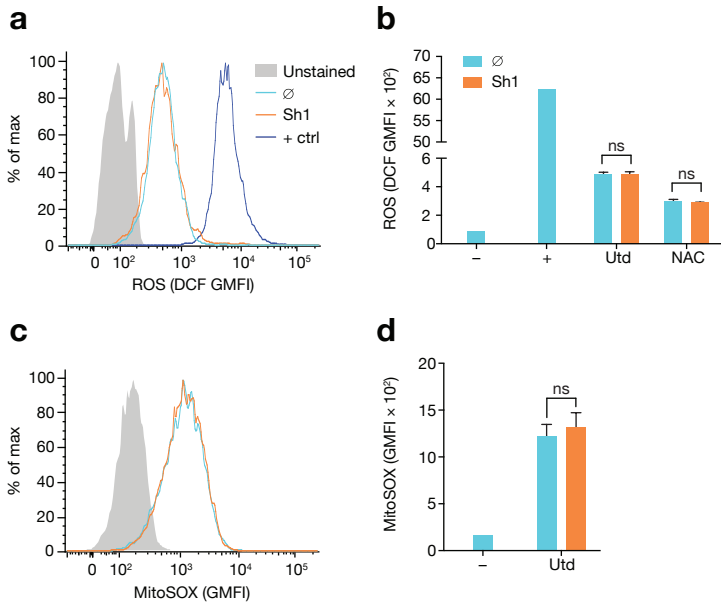

# Supplementary Figure 5

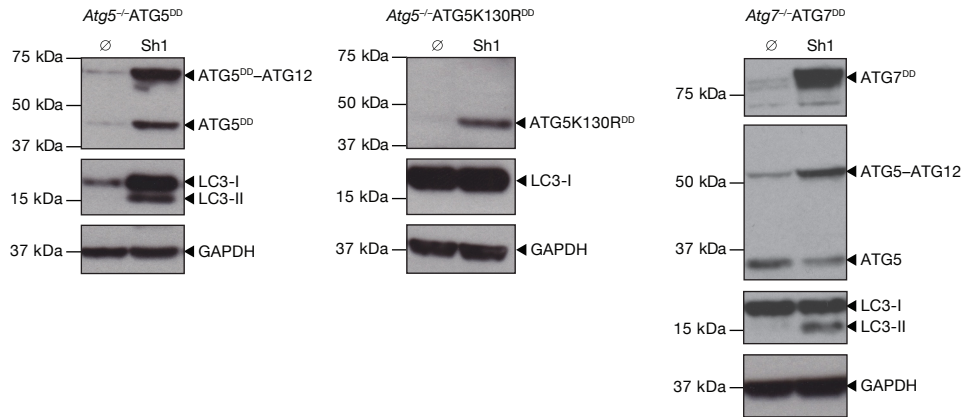

# Supplementary Figure 6

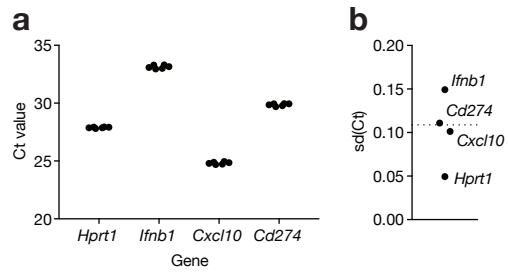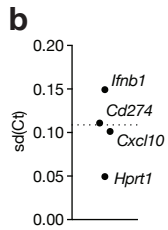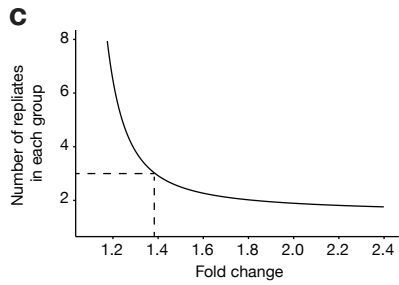

Supplement: 41419_2018_546_MOESM1_ESM.pdf [file 41419_2018_546_MOESM1_ESM.pdf]
